# Supplementary material for: The validation of the Beijing version of the Montreal Cognitive Assessment in Chinese patients undergoing hemodialysis
Source: PLoS One. 2020 Jan 9;15(1):e0227073. doi: 10.1371/journal.pone.0227073 (PMC6952078; doi:10.1371/journal.pone.0227073)
Supplement: S1 Table — (XLSX) [file pone.0227073.s002.xlsx]

## Sheet: Sheet1
Subject number	Sex:1=female,2=male	Age(years)	Education level:3=<=6years;2=6-12;1=>12	Smoking:3=never,2=ever,1=now	Alcohol intake:3=never,2=ever,1=now	Hypertension:2=no,1=yes	Diabetes:2=no,1=yes	Stroke:2=no,1=yes	CHD:2=no,1=yes	Dialysis vintage（months）	BMI	Kt/V	Hb(g/l)	Calcium(mmol/l)	Phosphate(mmol/l)	iPTH(pg/ml)	Depression scores	ADL scores	Basic ADL	Instrumental ADL
01-001	1	79	1	1	1	1	1	1	1	57	23.6614	0.84	88	2.07	1.52	265.7	4	20	7	13
01-002	2	66	2	3	3	1	2	2	2	18	20.6905	1.48	103	2.47	2.45	85.8	0	20	7	13
01-003	1	68	2	2	2	1	1	2	1	161	27.5374	1.24	110	2.24	3.03	171.1	4	20	7	13
01-004	2	63	1	2	1	1	2	2	2	17	25.0519	1.39	103	2.78	2	132.4	3	20	7	13
01-005	2	61	2	2	2	1	1	2	1	16	24.9135	1	97	2.23	2.25	325.6	2	20	7	13
01-006	2	67	2	3	1	1	2	2	2	59	21.986	1.52	108	2.01	1.93	215.4	1	20	7	13
01-007	1	68	2	2	2	1	2	2	2	185	27.4747	1.43	107	2.15	2.15	138.8	6	20	7	13
01-008	2	54	2	1	2	1	2	2	2	163	27.9421	1.31	100	2.58	1.73	2.9	8	20	7	13
01-009	1	59	1	3	1	1	2	2	2	68	22.4996	1.23	120	2.03	3.58	228	4	20	7	13
01-010	2	79	1	3	3	1	2	2	1	53	26.8858	1.25	117	2.06	1.27	10.9	0	20	7	13
01-011	1	70	2	3	3	1	1	2	1	28	28.3039	1.14	126	2.36	1.43	394.1	3	20	7	13
01-012	2	67	2	3	3	1	1	1	1	34	27.3258	0.71	116	1.96	2.13	427.6	1	20	7	13
01-013	2	58	2	2	2	1	2	2	2	140	21.7193	1.33	131	2.2	1.75	416.6	17	20	7	13
01-014	2	73	1	1	3	1	2	2	2	22	29.8446	1.18	111	2.4	0.76	335.6	2	20	7	13
01-015	2	68	2	3	3	1	2	2	2	83	18.662	1.77	96	2.3	0.71	49.2	5	20	7	13
01-016	2	67	2	2	2	1	2	2	2	17	22.8529	1.43	54	2.36	0.66	193.7	2	20	7	13
01-017	2	76	2	3	3	1	2	2	2	22	21.3333	1.35	104	2.67	0.88	250.3	23	32	7	25
01-018	1	73	1	2	2	1	2	2	2	114	25.0135	1.05	135	2.38	0.7	53.5	7	20	7	13
01-019	1	56	2	2	1	1	2	1	1	120	22.7127	1.48	114	2.22	0.74	1	0	20	7	13
01-020	1	56	2	1	3	1	2	2	2	72	21.6441	1.53	112	2.52	0.31	178.6	13	68	24	44
01-021	1	59	2	3	3	1	2	2	2	64	19.3088	1.81	112	2.17	0.89	381	4	20	7	13
01-022	2	79	2	3	3	1	2	2	2	77	35.8839	1.66	111	1.17	1.21	205.4	3	20	7	13
01-023	2	66	2	3	2	1	2	2	2	162	24.8438	1.46	126	2.62	1.25	162.8	2	20	7	13
01-024	1	69	2	3	2	1	2	2	2	161	26.3958	1.56	114	2.28	1.64	38.6	4	20	7	13
01-025	1	54	2	3	3	1	2	2	1	77	22.5896	1.39	128	2.56	0.88	245.8	5	20	7	13
01-026	1	59	2	3	2	1	2	2	2	161	21.0198	1.88	92	1.78	1.8	356.1	5	20	7	13
01-027	2	77	2	3	3	1	2	2	2	84	23.538	1.65	93	2.55	2.64	150.7	3	20	7	13
01-028	2	73	1	2	2	1	2	2	2	87	21.8023	1.23	120	2.36	2.28	140.6	3	21	7	14
01-029	1	70	1	3	3	1	2	2	2	90	25.7778	1.72	109	2.2	2.84	263.1	18	20	7	13
01-030	2	75	2	2	3	1	2	2	2	21	24.1327	1.18	106	2.66	2.04	189	7	20	7	13
01-031	1	66	2	1	2	1	1	2	1	50	30.2992	0.91	133	2.5	1.78	428.8	6	20	7	13
01-032	2	58	2	1	2	1	2	2	2	65	25.9516	1.17	130	2.23	1.6	792.2	3	20	7	13
01-033	2	79	1	3	2	1	2	2	2	8	23.3564	1.09	105	2.42	1.66	303.8	2	20	7	13
01-034	1	57	2	2	2	1	1	2	1	21	30.457	0.9	120	1.76	2.09	337.4	4	20	7	13
01-035	1	58	2	3	3	1	1	1	1	53	29.9357	1.21	114	2.45	2.28	270	1	20	7	13
01-036	2	56	1	3	3	1	1	2	2	89	21.0068	1.84	99	2.37	1.63	485.5	1	20	7	13
01-037	2	68	2	1	3	2	2	2	2	165	22.3081	1.6	118	2.12	2.19	717.2	7	20	7	13
01-038	2	57	1	2	3	2	2	2	2	11	23.3218	1.31	93	2.42	1.16	13.5	1	20	7	13
01-039	2	59	1	2	2	1	1	2	1	72	21.4844	1.52	121	2.38	1.91	103.7	2	20	7	13
01-040	1	60	1	3	3	1	1	2	1	54	30.9245	1.15	119	2.36	1.68	389.6	5	20	7	13
01-041	2	66	2	3	3	1	1	2	2	33	21.378	1.49	125	2.08	1.76	226.6	6	20	7	13
01-042	1	80	1	3	3	1	1	2	1	8	29.1667	0.98	119	2.52	2.17	165.1	5	20	7	13
01-043	2	78	1	1	3	1	1	1	2	63	20.1951	1.6	112	2.28	1.68	167.7	1	20	7	13
01-044	1	68	2	3	3	1	2	2	2	104	20.5078	1.81	124	2.04	1.59	177.1	1	20	7	13
01-045	2	59	2	3	1	1	1	2	1	14	26.0375	1.27	101	2.49	1.51	293.2	1	20	7	13
01-046	2	67	1	3	3	1	2	1	1	31	24.4418	1.19	108	2.22	1.19	81.3	2	20	7	13
01-047	1	67	2	2	2	1	1	1	1	107	18.5911	1.5	128	2.12	1.24	389.5	18	22	7	15
01-048	2	59	3	3	3	1	1	2	2	24	23.1009	0.97	96	1.99	2.62	103.3	6	20	7	13
01-049	1	55	2	2	1	1	1	2	2	8	20.8086	1.27	118	2.25	2.35	80.8	2	20	7	13
01-050	1	56	2	3	3	1	1	2	1	32	27.4077	1.24	106	1.94	1.31	321.2	5	20	7	13
01-051	2	59	2	1	2	1	2	2	2	206	19.2336	1.5	102	2.27	2.13	196.2	1	20	7	13
01-052	2	69	2	2	3	1	1	2	2	149	23.3234	1.46	120	2.63	1.36	338.4	9	21	7	14
01-053	2	56	2	2	3	1	2	2	2	29	24.794	1.18	112	2.09	1.32	1119.9	18	30	7	23
01-054	1	67	1	3	3	1	2	1	2	197	19.6511	1.71	110	2.26	3.03	26.5	10	29	7	22
01-055	1	79	2	3	3	1	1	1	2	22	21.0388	1.85	112	2.33	2.62	78.8	3	20	7	13
01-056	1	65	2	2	2	1	2	2	2	192	24.1579	1.68	109	2.61	0.67	1	0	20	7	13
01-057	2	69	1	3	3	1	2	2	2	84	16.7969	1.65	114	1.88	1.62	378.8	11	21	7	14
01-058	2	61	1	3	3	1	2	2	2	65	23.642	1.19	123	2.06	1.14	429.2	2	38	8	30
01-059	2	59	1	3	3	1	2	2	2	102	18.9681	1.42	117	2.33	0.86	137.6	13	24	7	17
01-060	2	55	1	2	2	1	2	2	2	5	23.1473	1.2	104	2.04	1.18	465.3	0	20	7	13
01-061	2	70	1	3	3	2	2	2	1	27	24.3024	1.21	115	1.93	2.98	102.9	1	20	7	13
01-062	1	77	2	1	1	1	1	1	1	28	22.7732	1.4	89	2.2	1.86	42	1	20	7	13
01-063	1	79	2	2	2	1	1	1	1	70	29.843	1.3	116	2.73	1.98	804	1	20	7	13
01-064	2	70	2	3	3	1	1	2	2	4	25.3906	1.32	89	1.85	2.69	114.3	2	20	7	13
01-065	1	54	1	3	3	1	2	1	2	49	25.7276	1.27	113	2.22	1.64	130.4	3	20	7	13
01-066	2	68	3	3	3	1	2	2	2	66	18.1955	1.66	125	2.13	1.92	200	3	23	7	16
01-067	2	59	1	3	3	1	2	2	1	127	14.533	1.44	129	2.46	2.07	515.7	7	37	8	29
01-068	1	66	2	2	2	1	2	2	2	75	26.0933	1.5	129	2.25	2.11	254.2	9	20	7	13
01-069	1	68	2	3	3	1	2	2	1	19	22.5466	1.67	115	2.07	0.95	170.2	8	20	7	13
01-070	1	64	2	2	2	1	1	2	2	24	22.4913	1.01	86	2.08	1.24	236.5	0	20	7	13
01-071	2	59	1	3	3	1	2	2	2	43	23.8918	1.37	78	2.13	3.12	494.1	7	20	7	13
01-072	1	64	2	2	2	1	2	2	2	57	24.64	1.31	105	2.32	1.59	228.3	6	20	7	13
01-073	2	59	2	1	2	1	1	2	1	77	32.1799	0.9	110			662	0	20	7	13
01-074	1	59	2	3	3	1	1	1	1	90	25.9111	1.76	121	2.57	1.53	75.8	4	20	7	13
01-075	1	66	2	3	3	1	2	2	2	21	20.6905	1.69	110	2.34	1.89	63.3	0	20	7	13
01-076	2	60	1	3	3	1	2	2	2	127	19.5312	1.61	93	2.23	0.94	182.7	0	20	7	13
01-077	2	59	1	3	3	1	2	2	2	68	24.6755	1.3	103	1.94	1.24	88.6	19	43	9	34
01-078	2	53	1	2	3	1	2	2	2	77	18.1018	1.42	144	2.03	1.07	147.2	5	21	7	14
01-079	2	71	2	2	2	1	1	2	1	86	21.1325	1.32	75	2.11	2.38	183.3	1	20	7	13
01-080	1	59	2	3	3	1	2	2	1	85	30.8185	1.38	117	2.12	0.83	11.5	15	36	8	28
01-081	2	79	2	3	3	1	1	2	2	12	30.863	1.22	103	2.52	0.82	108.8	1	20	7	13
01-082	1	50	2	3	3	1	1	2	1	7	29.3199	0.55	115	2.6	0.84	398.3	0	20	7	13
01-083	2	53	2	3	3	2	2	2	2	62	30.0244	1.33	115	2.78	0.75	161	0	20	7	13
01-084	1	65	2	2	3	1	1	2	1	3	23.4075	1.25	120	2.64	0.77	183.4	5	26	7	19
01-085	1	67	2	2	2	1	2	2	2	42		1.25	112	2.49	0.82	595.5	0	20	7	13
01-086	2	51	1	3	3	1	2	2	1	116	21.7188	1.63	109	2.24	0.82	661.8	6	20	7	13
01-087	2	57	2	2	2	1	1	1	2	35	22.5686	1.38	117	2.11	2.15	171	0	20	7	13
01-088	2	55	1	2	2	2	1	1	1	37	25.4088	1.38	133	2.37	1.69	267	18	38	7	31
01-089	2	62	2	3	3	2	2	2	2	30	24.3141	1.26	108	2.17	1.94	368.7	20	20	7	13
01-090	1	54	2	2	1	1	2	2	2	133	24.8364	1.25	111	2.51	1.08	279.5	1	24	7	17
01-091	1	59	2	2	2	1	1	1	1	42	21.1306	1.21	131	2.4	1.16	99.6	7	29	10	19
01-092	1	59	1	2	2	1	1	2	2	80	21.1306	1.25	101	2.51	0.92	193.4	0	20	7	13
01-093	2	57	1	1	2	1	1	2	2	70	20.5516	1.44	109	2.51	1.51	170.8	3	20	7	13
01-094	2	59	2	3	2	1	1	2	2	38	27.6321	1.32	121	2.05	1.54	27.6	1	20	7	13
01-095	1	55	2	3	3	1	2	2	2	42	18.1449	1.48	79	2.19	1.29	234.5	2	20	7	13
01-096	1	66	1	3	3	1	1	2	2	65	18.7652	1.79	134	2.2	0.67	106.1	3	20	7	13
01-097	1	59	2	3	3	1	2	1	1	31	24.4083	1.45	111	2.19	1.11	56.7	4	20	7	13
01-098	2	56	2	3	3	1	2	2	2	60	26.749	1.49	118	2.19	1.49	62.6	1	20	7	13
01-099	1	59	2	2	3	1	1	2	2	8	21.4508	1.22	68	1.98	0.98	97.6	2	20	7	13
01-100	1	70	1	1	1	1	2	2	1	100	25.7117	1.68	99	2.39	1.81	350.4	3	28	7	21
01-101	2	66	2	2	2	1	1	1	2	13	26.0462	1.2	89	2.07	2.42	27.2	0	20	7	13
01-102	1	72	2	3	3	1	1	1	1	45	28.8623	1.39	89	2.39	1.97	145.1	5	20	7	13
01-103	1	70	1	1	1	1	2	2	2	84	23.0469	1.68	103	2.14	1.66	167.6	0	20	7	13
01-104	2	52	2	3	2	1	2	2	1	120	25.8166	1.62	142	2.32	2.04	79.1	0	20	7	13
01-105	2	66	1	3	3	1	1	2	2	118	24.1617	1.64	111	2.45	1.45	161	28	20	7	13
01-106	1	58	1	3	3	1	2	2	2	48	20.661	1.27	109	2.14	1.33	466.8	3	20	7	13
01-107	2	66	2	3	3	1	1	2	1	11	18.6095	1.56	119	1.98	1.59	74.1	2	21	7	14
02-001	2	51	1	3	3	1	2	2	2	110	24.6	1.58	113	2.28	1.07	17.3	8	20	7	13
02-002	1	80	2	2	2	1	2	2	2	66	21.4711	1.297	117	2.93	1.02	501.9	0	20	7	13
02-003	2	59	2	3	3	1	1	1	1	14	22.4532	1.703	118	2.22	1.7	28.5	0	24	7	17
02-004	2	58	3	3	3	1	1	2	2	46	21.4138	1.612	111	2.08	2.53	476.2	0	20	7	13
02-005	2	80	2	3	3	1	2	2	1	25	25.7698	1.864	119	2.12	1.32	804	7	20	7	13
02-006	2	57	1	3	3	1	1	2	2	10	21.4138	1.31	114	2.03	2.09	135.5	0	20	7	13
02-007	2	59	1	3	3	2	2	2	2	105	25.7698	1.472	118	2.11	2.5	358.3	1	20	7	13
02-008	2	77	3	3	3	2	2	2	2	65	22.5	1.566	114	2.22	1.39	689.1	0	20	7	13
02-009	2	59	2	3	3	1	2	2	2	226	24.4	1.972	109	2.36	2.66	2.2	7	21	7	14
02-010	1	61	1	3	3	1	2	2	1	112	24.3556	1.75	124	1.73	2.19	425.3	8	22	7	15
02-011	2	61	1	3	2	1	2	2	2	14	18.2113	1.518	108	2.26	1.38	117.9	3	20	7	13
02-018	2	70	2	2	2	1	1	2	2	6	26.7	1.22	109	2.35	1.5	85.7	16	24	7	17
02-019	2	70	2	3	3	1	2	2	2	60	25.1324	1.693	111	2.08	1.86	257.3	2	20	7	13
02-020	2	51	2	3	3	1	1	2	2	7	31.4	1.65	120	2.25	2.21	420.4	3	20	7	13
02-021	2	72	1	3	2	2	2	2	2	52	23.6	1.24	122	2.07	1.19	230.5	1	20	7	13
02-022	2	62	2	3	3	2	1	2	2	42	25.7			2.11	1.31	2.2	0	20	7	13
02-023	2	52	2	3	2	2	2	2	2	12	27.4			2.21	2.14	3.5	5	20	7	13
02-024	2	59	1	3	1	1	2	2	2	125	24.8	1.535	138	2.29	0.97	449.9	4	20	7	13
02-025	2	59	2	2	2	1	1	2	2	89	22.9	1.353	117	2.69	1.43	386.6	5	20	7	13
02-026	2	50	2	3	3	1	1	2	1	54	20.7			2.14	1.34	5.5	5	20	7	13
02-027	1	59	2	2	2	1	1	2	1	14	25.1	1.408	112	2.37	2.45	68	3	20	7	13
02-028	2	54	2	2	2	1	1	1	2	12	21.9	1.388	113	2.14	1.25	169	1	22	8	14
02-029	2	66	2	3	3	1	1	2	2	125	22.7			2.47	1.67	827.6	9	24	7	17
02-030	2	59	1	2	2	1	1	2	2	16	22			2.47	1.05	833.4	0	20	7	13
02-031	1	58	3	1	2	1	1	1	1	60	23.4			2.38	1.56	3.5	28	25	7	18
02-032	2	70	2	1	1	1	1	2	1	34	22.9	1.406	117	2.31	2.65	111.1	1	20	7	13
03-002	2	66	1	3	3	1	2	2	1	61	21.6128	1.56	101	2.08	2.08	46.77	2	20	7	13
03-003	1	55	2	3	3	1	2	2	2	4	16.4574	1.86	126	2.42	1.33	126	17	20	7	13
03-004	1	59	2	2	2	1	2	2	1	29	26.7539	1.019	85	1.87	1.59	300.73	12	27	7	20
03-005	1	58	2	2	2	1	2	1	1	140	21.5978	1.17	132	2.41	1.34	288	16	20	7	13
03-006	1	67	3	2	3	1	2	2	2	39	21.6797	1.492	123	2.65	2.47	112.12	7	20	7	13
03-007	2	54	2	1	1	1	2	2	1	68	17.54	1.55	102	2.06	1.31	400.11	26	48	11	37
03-008	2	57	1	1	3	1	2	2	2	144	20.519	1.68	113	2.2	1.66	156	0	20	7	13
03-009	2	59	2	3	3	1	1	2	1	37	23.4375	1.83	106	2.31	2.45	132.3	1	20	7	13
03-010	1	61	2	1	2	1	2	2	2	70	19.4104	1.27	119	2.33	1.4	572.43	21	20	7	13
03-011	2	50	2	3	2	1	2	2	2	4	27.4587	1.11	130	2.59	1.46	181.71	7	20	7	13
03-012	2	69	2	3	3	1	2	2	2	67	18.3556	2	110	2.41	2.25	197.46	0	20	7	13
03-013	2	69	2	1	3	1	1	1	1	36	19.654	1.51	122	2.19	1.98	375.5	4	20	7	13
03-014	1	79	1	2	2	1	2	2	2	79	22.4531	1.46	97	2	2.91	367.39	7	20	7	13
03-015	1	58	2	2	2	1	1	2	1	46	16.5391	1.43	88	1.98	1.73	150.3	8	20	7	13
03-016	1	50	1	2	3	2	2	2	2	108	16.2234	1.98	115	1.66	2.23	323.63	4	22	7	15
03-017	2	69	2	1	2	1	1	2	2	48	21.6358	1.24	109	1.98	1.67	102.78	14	39	12	27
03-018	1	51	3	3	3	1	1	2	1	78	29.3333	1.39	98	2.07	1.19	473.85	2	20	7	13
03-019	1	66	2	2	2	1	2	2	1	89	19.3359	1.41	138	2.01	2.95	643.6	0	20	7	13
03-020	2	58	2	3	3	1	2	2	1	321	17.2737	1.948	123	2.23	1.98	47.7	6	20	7	13
03-021	1	57	2	2	1	1	1	1	2	15	19.2336	1.537	115	2.47	2.06	45.45	8	20	7	13
03-022	2	64	2	3	3	1	2	1	2	6	18.4911	1.712	79	2.36	1.27	35.7	17	37	7	30
03-023	1	58	2	1	3	1	1	2	1	113	20.0474	1.229	90	2.14	1.44	360.79	7	34	8	26
03-024	2	53	1	3	3	1	2	2	2	100	21.4536	1.91	115	2.13	1.64	30.08	8	29	8	21
03-025	2	61	2	2	2	2	2	2	2	6	21.2953	1.25	114	2.17	3.05	255.5	14	20	7	13
03-026	1	65	2	2	2	1	1	1	2	96	25.0995	1.23	122	2.07	1.45	268	8	20	7	13
03-027	2	67	2	3	3	1	2	2	2	102	25.5296	1.718	108	2.56	1.75	531.85	13	32	7	25
03-028	2	75	2	1	3	2	1	2	1	13	19.5312	1.637	126	2.14	1.94	274.5	9	20	7	13
03-029	1	51	2	2	2	1	2	2	1	42	22.5981	0.823	119	2.35	1.75	207.08	9	20	7	13
03-030	1	60	2	3	3	1	1	1	2	7	26.8358	1.357	107	2.02	1.81	187.37	19	20	7	13
03-031	1	51	2	1	2	2	2	2	2	6	29.6296	1.187	117	2.04	2.07	178.6	12	20	7	13
03-032	1	68	2	2	2	1	2	2	2	60	20.8209	1.11	103	2.05	2.51	286	2	20	7	13
03-033	1	65	2	2	1	1	2	2	2	10	21.0156	1.031	113	1.97	1.55	75	8	20	7	13
03-034	2	65	2	1	2	2	2	2	2	64	22.9066	1.6	107	2.24	1.82	222.3	7	20	7	13
03-035	1	68	2	3	3	1	2	2	2	119	19.7055	1.831	122	2.3	1.25	801.8	6	20	7	13
03-036	2	77	2	2	2	1	1	1	2	83	22.7596	1.381	134	2.15	2.21	144.9	10	20	7	13
03-037	1	67	2	3	3	1	1	2	2	60	19.3821	1.738	103	2.21	2.03	202.77	4	20	7	13
04-001	2	68	2	2	3	1	2	2	2	59	21.4509		117	2.37	1.89	236.8	12	23	7	16
04-002	1	50	2	1	2	2	1	2	1	5	22.1799		125	2.2	2.87	329.4	2	20	7	13
04-003	2	68	2	3	3	1	1	2	2	20	28.6501		116	2.25	2.68	287.7	6	20	7	13
04-004	1	70	1	3	3	2	2	2	2	139	22.9201		116	2.12	1.6	368.8	0	20	7	13
04-005	1	69	2	2	3	1	2	2	2	36	18.4775		109	2.18	2.21	44.9	9	20	7	13
04-006	1	64	2	3	3	1	2	2	2	52	21.7993		114	2.04	1.67	417.4	9	20	7	13
04-007	2	68	2	3	3	1	2	2	2	13	32.5391		120	2.36	2.15	87	1	59	18	41
04-008	1	61	2	3	3	2	2	2	1	222	17.0299		148	1.83	1.42	0	0	20	7	13
04-009	2	59	2	1	3	2	2	2	2	59	18.0623		117	2.39	1.78	475.6	2	20	7	13
04-010	1	70	3	3	3	2	2	2	2	156	26.6728		123	2.14	1.6	456.7	1	20	7	13
04-011	2	76	1	3	3	1	2	2	2	1	23.575		119	2.41	1.65	134.7	0	20	7	13
04-012	2	74	2	3	3	2	2	2	2	117	28.1641		111	1.88	1.06	28.8	5	20	7	13
04-013	2	67	1	3	3	1	2	2	2	68	18.4186		128	1.87	2.24	161.7	10	37	11	26
04-014	1	78	1	2	3	1	2	2	1	96	28.4009		101	2.15	2.91	58.9	0	20	7	13
04-015	1	59	2	3	3	1	2	2	2	20	30.3906		121	2.61	2.61	431.5	8	20	7	13
04-016	1	58	2	3	3	2	2	2	2	67	22.5164		100	2.1	1.73	483.7	6	20	7	13
04-018	2	72	2	2	2	1	2	2	2	117	18.0716		108	2.52	2.31	242.6	2	20	7	13
04-019	1	67	2	2	3	1	2	2	2	180	23.391		161	2.3	2.82	0	9	27	7	20
04-020	1	59	2	3	3	1	2	2	1	146	20.7111		132	2.19	0.72	45.7	4	20	7	13
04-021	2	71	1	3	3	2	2	2	2	78	18.8271		124	2.01	1.38	45	3	20	7	13
04-022	1	66	2	2	2	1	1	2	2	41	21.0939		118	2.41	1.58	128.6	14	20	7	13
04-023	1	69	2	3	3	1	2	2	2	138	23.8054		108	2.21	2.43	100.7	8	20	7	13
04-024	1	68	1	3	3	1	2	2	2	58	20.9697		124	2.06	1.82	1139.4	2	20	7	13
04-025	1	58	2	1	3	1	1	2	2	80	19.9744		134	1.71	2.33	595.9	13	55	16	39
04-026	1	59	2	2	2	1	2	2	2	114	24.5181			2.31	2.1	858	6	20	7	13
04-027	2	59	1	3	3	1	2	2	2	9	17.3905		117	2.58	1.93	659.8	6	20	7	13
04-028	2	78	2	3	3	1	2	2	2	15	23.1834		119	2.05	1.67	670	9	21	7	14
04-029	2	77	2	3	3	1	2	2	2	20	29.4531		122	2.13	1.71	270.2	6	20	7	13
04-030	2	69	2	3	3	1	2	2	1	72	20.1286		126	2.2	1.86	158.1	5	20	7	13
04-031	1	79	2	3	3	1	2	2	2	80	18.9062		113	2.39	1.38	350.7	6	20	7	13
04-032	1	64	2	1	1	1	2	2	2	14	26.3958		128	2.19	2.4	827.3	5	20	7	13
04-033	1	58	1	3	3	1	2	2	2	132	24.5536		114	2.27	1.73	443.9	10	20	7	13
04-034	1	69	1	3	3	1	2	2	2	240	24.5632		121	2.18	0.85	450.9	5	20	7	13
04-035	2	66	2	3	3	2	2	2	2	122	24.4		112	2.46	1.31	901.2	5	20	7	13
04-036	1	56	1	2	2	1	2	2	2	33	20.3102		124	2.25	1.31	500	6	20	7	13
04-037	2	50	1	3	3	2	2	2	1	78	22.2304		129	2.23	1.86	642.5	5	20	7	13
04-038	2	69	1	2	2	2	2	2	1	244	22.3195		125	2.23	1.35	636	4	20	7	13
04-039	2	59	2	3	3	1	2	2	2	56	16.7242		117	2.35	2.52	270.4	9	20	7	13
04-040	2	71	2	3	1	2	2	2	2	104	22.7344		142	2.12	1.46	256.3	10	20	7	13
04-041	1	59	1	3	3	2	2	2	2	16	24.6079		110	2.05	2.39	69.3	7	20	7	13
04-042	1	58	2	3	3	1	1	2	2	34	22.7732		116	2.13	1.63	122.6	11	20	7	13
04-043	2	68	2	3	3	1	1	2	2	45	27.0552		125	2.18	2.8	123.8	14	32	8	24
04-044	2	53	1	3	2	1	2	2	2	66	32.2831		104	2.44	1.73	13.27	6	20	7	13
04-045	2	70	2	1	3	1	2	1	2	36	24.8816			2.27	1.21	5.5	6	20	7	13
04-046	2	60	2	2	2	1	2	2	1	54	26.1738		92	2.17	3.13	13.27	6	20	7	13
04-047	1	57	2	3	3	2	2	2	1	30	19.313	1.65	106	2.14	2.73	17.3	8	22	7	15
04-048	1	79	1	3	3	1	2	2	2	70	24.3359		108	1.88	2.54	17.3	0	20	7	13
04-049	2	75	2	2	2	1	2	2	2	72	22.5722		121	2.48	1.87	319.4	5	20	7	13
04-050	1	72	2	3	2	1	2	2	2	288	28.0038		115	2.21	1.08	286.7	1	20	7	13
04-051	2	53	1	3	3	1	2	2	2	130	19.5556		126	2.2	0.88	367.7	8	20	7	13
04-052	2	66	2	3	3	1	2	2	2	89	19.4222		115	1.8	2.46	43.7	2	20	7	13
04-053	2	77	2	1	3	1	2	2	2	125	21.8985		121	2.23	1.03	418.7	1	22	7	15
04-054	2	70	1	2	3	1	2	2	2	138	22.4461		141	2.08	1.81	86	0	20	7	13
04-055	2	59	1	3	3	1	2	2	2	113	18.6593		117	2.14	1.26	98	4	21	7	14
04-056	1	56	2	3	3	1	2	2	1	52	29.0688		117			475.6	6	40	7	33
04-057	1	72	2	2	2	1	2	2	1	108	27.5918		154			456.7	10	20	7	13
04-059	2	77	2	1	2	1	1	1	1	54	26.2917		50	2.19	2.32	28.8	3	20	7	13
04-060	2	63	2	3	3	2	2	2	2	18	20.5457		111			58.9	4	26	7	19
04-061	1	66	2	2	2	1	2	2	2	207	24.6097		125	2.19	2.06	252.7	7	20	7	13
04-062	1	68	2	3	2	1	1	2	2	65	29.691		110	2.06	1.93	242.6	4	21	7	14
04-063	2	68	3	2	2	1	1	2	2	65	27.6254		132			46.8	4	20	7	13
04-064	2	68	2	1	3	1	2	2	2	155	25.2092		118			47.8	0	20	7	13
04-065	2	62	2	3	3	1	2	2	2	180	19.433		125	2.23	1.61	128.6	3	23	7	16
04-066	1	69	2	3	3	1	2	2	2	125	23.0148		113	2.15	2.02	100.7	23	32	7	25
04-067	1	66	2	3	3	1	1	2	1	125	27.7902		116	2.33	2.07	2.9	10	20	7	13
04-068	2	63	2	3	2	1	2	2	2	48	33.91		50	2.29	1.84	582.7	9	20	7	13
04-069	1	59	2	3	3	1	2	2	2	155	22.8329		130	1.93	1.58	103	5	22	7	15
04-070	2	57	1	3	3	1	2	2	2	14	17.8174		107	2.29	2.39	152.5	8	20	7	13
04-071	2	79	2	1	1	1	2	2	2	15	19.5918		75	2.46	1.74	270.2	7	20	7	13
04-073	2	59	2	3	3	1	2	2	2	53	22.5895		115	2.18	1.66	350.7	6	20	7	13
04-074	2	78	1	2	3	1	1	2	2	13	29.313		134	2.18	3.12	827.6	20	68	21	47
04-075	2	71	2	3	1	1	2	2	2	120	17.1468		118	2.16	0.31	471.9	3	35	12	23
04-076	1	66	2	2	2	1	2	2	1	155	29.0657		116	1.94	1.83	451.7	0	20	7	13
04-077	2	59	1	2	3	1	1	2	2	24	20.5247		121	2.01	0.51	902.7	2	20	7	13
04-078	2	68	2	3	3	1	2	2	2	185	25.4694		116	1.99	1.57	500	16	59	14	45
04-079	2	68	2	3	3	1	2	2	2	36	23.4509		108	2.23	1.17	642.5	0	23	7	16
04-080	2	69	2	3	2	2	2	2	2	298	25.0135		115	2.21	2.77	636	0	20	7	13
04-081	1	69	2	3	3	1	2	2	2	83	25.7202		115	2.33	2.39	270.4	4	20	7	13
04-082	1	79	2	2	2	1	2	2	2	12	19.1787		113	2.08	1.17	256.3	0	20	7	13
04-083	2	66	2	3	3	1	1	2	2	149	21.7193		116	2.32	1.22	122.6	0	20	7	13
04-084	1	68	2	3	3	1	2	1	2	135	18.7			2.44	1.6	870.8	0	20	7	13
04-085	2	59	2	3	3	1	2	2	2	39	30.2	1.243	114	2.41	1.18	887	7	20	7	13
04-086	1	69	2	3	3	1	1	2	2	269	25.4	1.622	109	1.95	1.15	901.2	10	20	7	13
04-087	2	59	2	3	3	1	2	2	2	225	21.1	1.244	111	2	1.17	1000	0	20	7	13
04-088	2	59	1	2	2	1	2	2	2	75	25	1.988	115	2.19	1.67	1002	9	0	0	0
04-089	2	79	2	2	3	1	2	2	2	41	25	1.245	121	2.28	1.44	1080	10	26	7	19
04-090	2	66	1	2	2	1	1	2	2	29	26	0.855	115	2.01	1.7	1119.9	3	20	7	13
04-091	2	79	3	3	3	2	2	2	2	27	26.1	1.383	117	2.3	2.33	1134	0	20	7	13
04-092	2	60	1	3	3	1	2	2	2	98	21	1.253	117	2.26	2.29	22.3	0	20	7	13
04-093	2	71	1	3	3	1	2	2	2	150	32.1333	1.533	126	1.98	1.9	28.8	0	20	7	13
04-094	2	77	1	2	2	1	2	2	2	125	23		114	2.02	2.79	1139.4	0	20	7	13
04-095	2	78	2	3	3	1	1	2	2	48	28.4	1.533	109	2.04	2.35	22.3	5	20	7	13
05-001	1	76	2	3	3	1	1	2	1	15	19.7137	1.7	102	2.47	0.89	227.1	0	22	7	15
05-002	1	58	3	3	3	2	2	2	2	21	23.4	4.3	120	2.41	0.62	142.3	0	20	7	13
05-003	2	59	2	2	2	1	2	2	2	96	17.301	1.81	133	2.56	0.52	171.9	0	20	7	13
05-004	2	68	2	3	3	1	1	1	1	4	30.4688	1.52	101	2.48	0.77	58.1	1	20	7	13
05-005	2	75	1	3	3	1	1	2	2	108	21.2585	1.5	100	2.24	1.29	462.8	0	21	7	14
05-006	1	79	2	1	3	1	1	2	2	53	29.3878	1.25	84	2.59	0.93	281.7	0	20	7	13
05-007	1	74	2	3	3	1	1	2	2	58	12.3385		114	2.18	0.58	225.6	1	20	7	13
05-008	2	77	2	3	3	1	1	1	1	8	23.4375		118	2.34	0.65	13.1	0	20	7	13
05-010	2	59	1	3	3	1	1	2	2	14	21.573		82	2.38	0.51	119.6	0	20	7	13
05-011	2	68	2	2	2	1	1	1	2	17	29.4118		128	2.63	0.96	156.4	10	20	7	13
05-012	2	59	1	3	2	1	2	2	2	37	25.3934		116	2.51	0.7	74.1	1	26	7	19
05-013	1	59	1	3	2	1	1	2	2	53	22.0072		107	2.96	1.01	337.3	2	20	7	13
05-014	1	69	2	3	3	1	1	2	1	65	22.1893		92	2.27	0.79	221.3	1	20	7	13
05-015	2	69	2	3	3	1	2	2	2	36	23.5102		50	2.11	2.15	107.2	0	20	7	13
05-016	2	75	2	1	1	1	2	2	2	48	26.7299		105	2.75	0.72	213.7	0	20	7	13
05-017	2	59	3	3	3	1	2	2	2	36	21.5556		94	2.43	1.12	77.6	6	20	7	13
05-018	2	63	2	2	2	1	1	2	1	84	24.8016		111	2.54	0.76	166.8	22	43	9	34
05-019	2	58	2	1	3	1	1	1	2	113	23.8895		107	2.55	0.72	90.9	6	20	7	13
05-020	2	58	3	2	2	1	1	1	1	13	26.0276		104	2.45	0.97	204.3	0	20	7	13
05-021	2	55	1	3	3	1	1	1	1	53	24.5351		117			97.1	0	20	7	13
05-022	2	68	1	2	2	1	1	2	1	22	20.898		120	2.36	1.23	220.4	14	50	13	37
05-023	1	69	2	3	3	1	1	2	2	53	26.8136		95	2.53	0.75	83.2	0	20	7	13
05-024	2	61	2	2	2	1	1	1	2	24	29.7521		121	2.38	1.49	226.5	0	20	7	13
05-025	2	75	2	3	3	1	2	2	2	108	22.3133		103	2.21	2.51	32.7	0	20	7	13
05-026	1	59	1	2	2	1	2	1	1	41	26.5731		101	2.76	0.64	58.6	0	20	7	13
05-027	1	76	2	3	3	1	2	1	1	125	21.7955		118	2.66	1.12	164.7	0	20	7	13
05-028	2	70	2	3	3	1	2	2	2	24	19.3772		51	2.87	1.28	91.5	0	20	7	13
05-029	1	70	1	2	2	1	1	2	2	84	24.2907		111	2.53	0.84	259.3	0	23	7	16
05-030	2	81	1	2	2	1	1	1	2	9	21.9713		150	2.78	1.07	1.76	0	22	7	15
05-031	2	77	2	3	3	1	2	2	2	17	17.7778		101	2.73	0.57	148.5	0	20	7	13
05-032	2	65	2	3	3	1	2	2	2	29	25.711			2.42	0.87	255.2	4	20	7	13
05-033	2	65	2	2	1	1	2	2	1	20	26.8745		117	2.56	0.7	324.2	0	20	7	13
05-034	2	55	2	1	3	1	1	2	1	72	34.6021		120	2.1	0.94	252.6	0	20	7	13
06-001	1	57	2	3	3	1	1	2	2	16	23.2446	1.085	108			216.2	13	20	7	13
06-002	1	78	2	3	3	1	2	1	1	287	22.5575	1.523	101	2.5	0.86	283.4	0	20	7	13
06-003	1	62	2	3	3	1	2	1	1	235	20.4591	1.624	100	2.76	0.94	373.5	0	23	7	16
06-004	1	59	2	3	3	1	1	2	1	39	28.6501	1.634	102	2.17	0.89	244.3	8	20	7	13
06-005	1	76	1	3	3	1	2	2	1	36	21.5645	1.462	104	2.36	0.65	204.5	14	41	11	30
06-006	2	50	1	2	2	1	1	2	2	70	24.4646	1.066	71	2.18	0.58	160	0	20	7	13
06-007	1	53	3	3	3	2	2	2	1	45	21.8549	1.677	108	2.04	0.69	350.8	10	20	7	13
06-008	2	59	2	3	3	1	2	2	1	27	22.8125	1.714	116	2.65	0.68	459.9	2	20	7	13
06-009	1	68	3	3	3	1	1	1	1	62	24.1288	1.507	95	2.39	0.85	243.1	0	20	7	13
06-010	2	66	1	3	3	1	2	2	2	57	20.0526	2.031	104	2.84	0.86	316.6	10	45	13	32
06-011	2	69	2	3	3	1	2	2	1	71	22.6811	1.511	119	2.55	1.14	101.3	1	20	7	13
06-012	2	68	2	3	3	1	1	2	2	13	27.1605	1.306	106	1.89	2.07	134.7	6	20	7	13
06-013	2	77	2	1	3	1	1	2	1	35	24.2215	1.1	114	2.07	1.25	29.67			0	0
06-014	1	57	2	2	2	1	2	2	1	218	24.9671	1.126	118	1.95	2.46	229.5	0	31	10	21
06-015	2	71	1	3	3	2	2	2	1	317	24.8445	2.366	105	2.69	0.83	176.7	3	26	7	19
06-016	2	59	1	3	3	1	2	2	2	177	18.6122	1.761	118	2.2	0.78	325.5	13	24	7	17
06-017	2	53	1	3	3	1	1	2	1	60	16.4753	2.055	125	2.42	1.06	144.1	3	20	7	13
06-018	2	58	3	3	3	1	1	2	1	20	24.0234	1.291	119	2.38	1.49	128.6	1	20	7	13
06-019	2	58	1	3	2	1	2	2	2	128	24.7934	1.459	102	2.22	0.61	268.3	0	20	7	13
06-020	1	77	2	1	3	1	1	1	1	117	29.2388	1.281	96	2.77	1.18	1002	8	20	7	13
06-021	2	75	1	3	3	1	1	2	1	269	18.8581	2.065	98	2.39	1.1	327.5	0	20	7	13
06-022	2	68	2	1	2	1	1	2	1	104	17.4726	1.502	108	1.26	0.88	165.8	7	21	7	14
06-023	1	58	2	2	3	1	1	2	1	64	25.8586	1.382	112	2.78	1.31	43.32	8	20	7	13
06-024	1	57	1	3	3	1	2	2	2	9	25.1953	1.253	94	1.99	2.42	85.17	8	20	7	13
06-025	1	57	2	2	2	1	1	1	2	14	24.5739	1.267	116	2.31	1.12	297.2	1	20	7	13
06-026	2	68	1	3	3	1	2	1	2	10	21.542	1.499	97	1.86	0.89	65.29	0	20	7	13
06-027	1	56	1	2	3	1	1	2	1	251	20.679	1.16	101	2.73	0.57	30.92	5	22	7	15
06-028	2	59	1	2	2	1	1	2	2	19	23.6614	1.3	105			282.7	4	22	7	15
06-029	2	57	2	1	2	1	2	2	2	156	29.7211	1.398	115	2.28	1.92	29.16	4	20	7	13
06-030	1	66	1	1	2	1	1	2	2	24	27.291	1.126	117	1.75	2.15	373.3	3	24	7	17
06-031	1	59	2	3	3	1	1	1	1	57	21.3333	1.955	101	2.45	1.48	518	1	33	8	25
06-032	2	69	2	2	2	1	2	2	1	244	24.9219	1.411	127	2.05	2.7	4.99	3	20	7	13
06-033	2	69	3	3	3	1	1	2	2	91	21.9428	1.629	111	2.4	2.48	392.8	1	20	7	13
06-034	2	59	2	3	3	2	2	2	2	24	21.2891	1.74	100	2.49	1.68	87.98	3	25	7	18
06-035	1	58	1	2	2	1	1	2	2	138	22.9854	1.429	118	2.63	2.49	439.9	2	70	22	48
06-036	1	54	2	3	3	1	2	2	1	145	19.049	2.363	116	2.12	1.4	101.3	11	20	7	13
06-037	2	72	1	3	3	1	1	2	1	115	23.5482	1.935	110	2.06	1.76	209.6	0	20	7	13
06-038	2	59	2	3	2	1	1	2	1	25	24.1685	1.458	111	2.17	1.58	261.9	0	20	7	13
06-039	2	59	2	3	3	1	1	1	1	10	18.9473	1.525	83	2.32	2.49	180.6	14	34	7	27
06-040	2	58	1	3	3	1	2	2	2	104	22.5827	1.652	103	2.2	1.61	112.4	0	21	7	14
06-041	1	50	1	1	3	1	2	2	2	16	20.1953	1.614	113	2.16	1.52	167.6	0	21	7	14
06-042	2	56	1	3	3	1	2	2	1	90	23.3242	1.623	116	2.45	2.19	131.7			0	0
06-043	1	58	2	2	2	2	2	2	1	185	23.3011	1.76	116	2.3	2.43	24.97	0	20	7	13
06-044	2	58	2	3	3	1	2	2	1	179	21.5019	1.86	105	2.3	2.2	1134	1	20	7	13
06-045	2	59	1	3	1	2	2	2	2	32	19.8616	1.483	101	2.57	0.82	306.7	5	20	7	13
06-046	1	57	2	3	2	1	1	2	2	100	24.8016	1.64	103	2.24	1.85	434.4	4	20	7	13
06-047	1	57	1	2	2	1	2	2	2	120	20.0784	1.436	99	2.07	2.07	381	4	20	7	13
06-048	1	50	2	3	2	1	2	2	2	65	28.1245	1.645	101	2.33	1.41	177.1	4	20	7	13
06-049	2	59	2	3	2	1	2	2	2	218	21.8685	1.681	111	2.35	1.72	5.78	1	20	7	13
06-050	2	55	2	3	2	1	2	2	2	207	15.8194	1.752	128	2.43	2.03	187.6	0	20	7	13
06-051	2	58	1	3	3	1	2	2	1	201	21.6016	1.961	104	2.22	1.63	519.8	6	20	7	13
06-052	2	60	2	2	2	1	1	2	1	47	31.1837	1.047	121	2.34	0.53	381.4	2	20	7	13
06-053	2	58	1	2	2	1	1	2	2	48	21.8685	1.595	111	2.33	2.29	91.19	4	20	7	13
06-054	2	57	2	2	2	1	2	2	1	103	24.9649	1.514	135	2.39	2.21	73.26	1	20	7	13
06-055	1	57	2	3	2	1	2	2	2	122	21.875	1.754	136	2.12	1.83	182.7	1	20	7	13
07-001	1	59	2	3	2	1	2	2	1	105	16.2031	1.92	107	2.15	2.62	292.1	7	33	12	21
07-002	2	71	2	3	2	1	2	2	2	20	27.9904	1.23	104	2.18	1.61	211.3	4	20	7	13
07-003	1	50	1	2	2	1	2	2	1	122	22.5306	1.54	108	1.93	2.05	292.1	7	20	7	13
07-004	2	67	2	3	3	1	2	2	2	89	20.6698	1.65	113	2.29	2.81	50.32	2	37	13	24
07-005	2	54	2	3	3	2	2	2	1	28	30.8329	1.4	106	2.47	1.53	275.5	9	52	13	39
07-006	1	60	1	3	3	1	1	2	2	104	20.8533	2.1	115	2.51	2	109.4	5	20	7	13
07-007	2	50	1	2	2	1	2	2	2	60	25.7623	1.4	119	2.21	3.19	136.5	4	20	7	13
07-009	2	58	2	2	2	1	1	2	1	36	24.6914	1.16	107	2.27	1.46	187	0	20	7	13
07-010	1	60	1	3	3	1	2	2	1	133	18.2222	1.77	109	2.22	0.27	299.4	4	58	17	41
07-011	2	59	2	3	3	1	2	2	2	108	26.9274	1.36	113	2.18	2.24	275.9	1	20	7	13
07-012	2	68	1	3	3	1	2	2	2	130	23.5539	1.4	109	2.28	2.19	158.4	1	20	7	13
07-013	1	57	1	3	2	1	2	2	2	94	46.72	1.23	116	2.15	0.8	1082	4	20	7	13
07-014	2	68	2	3	2	1	2	2	2	15	22.6562	1.66	117	2.65	1.12	99.52	3	20	7	13
07-015	1	78	2	3	3	1	1	2	2	220	17.6606	1.85	132	2.26	1.23	585.2	0	20	7	13
07-016	1	58	2	3	2	1	1	2	2	171	22.5309	1.25	133	1.87	1.48	1000	14	24	7	17
07-017	2	59	2	3	2	1	2	2	2	43	27.6852	1.15	118	2.46	1.95	103	4	20	7	13
07-018	2	77	2	3	2	2	2	2	2	65	25.7571	1.51	120	2.49	1.75	401.1	0	20	7	13
07-019	2	70	2	3	2	1	2	2	1	67	56.5	1.8	105	2.07	1.5	178.6	2	20	7	13
07-020	1	69	2	2	2	1	2	1	1	110	16.609	1.54	127	2.38	1.23	528.1	1	20	7	13
08-001	2	58	2	3	3	1	2	2	2	69		1.51	118	2.44	1.11	152.5	4	20	7	13
08-002	1	57	2	3	3	1	1	2	2	23		1.313	117	2.39	1.12	146.6	5	20	7	13
08-003	1	78	1	3	3	1	2	2	2	120		1.171	143	2.25	1.74	2.2	4	22	7	15
08-004	1	62	2	2	3	1	1	2	2	11		1.237	123	2.59	1.16	200.7	0	20	7	13
08-005	2	70	3	3	3	1	2	2	2	116		1.809	88	2.12	1.58	160	1	20	7	13
08-006	1	63	2	2	2	1	1	2	2	14	29.0819	1.273	101	2.4	1.77	177.1	8	20	7	13
08-007	2	61	3	3	3	1	1	2	1	15	20.4959	1.469	120	2.11	1.18	50.22	2	20	7	13
08-008	2	60	2	2	2	1	2	2	2	31	27.4394	1.341	96	2.11	0.79	156	0	20	7	13
08-009	2	62	2	2	2	1	2	2	2	78	21.9375	1.438	121	2.5	1.9	351.1	0	21	7	14
08-010	2	80	2	2	3	1	2	2	2	21		0.975	107	2.23	1.95	942.4	0	20	7	13
08-011	2	58	2	2	3	1	1	1	1	60	27.4348	1.306	132	2.21	1.13	315.4	1	20	7	13
08-012	1	57	2	2	2	1	1	2	1	50	27.9894	1.207	135	2.22	1.69	646	8	20	7	13
08-013	1	79	2	3	3	1	2	2	2	50	23.7919	1.097	95	2.12	2.07	363.2	0	20	7	13
08-014	1	50	3	3	2	2	2	2	2	6	18.231	1.34	126	2.26	1.6	22.3	3	20	7	13
08-015	2	65	2	3	3	1	2	2	2	39	26.1505	1.172	102	2.26	1.92	209.6	2	20	7	13
08-016	1	59	2	3	3	1	2	1	2	104	20.7111	1.327	114	2.06	1.22	308.3	1	20	7	13
08-017	2	59	1	2	2	1	1	2	1	54	33.9073	0.985	134	2.22	1.45	167.6	19	22	8	14
08-018	1	59	1	3	3	1	1	2	2	25		0.822	113	2.09	1.65	109.5	2	21	7	14
08-019	1	51	2	2	2	1	1	2	2	32		1.24	100	2.54	1.89	332.8	2	25	9	16
08-020	2	55	2	2	2	1	2	2	2	67		1.214	111	2.28	1.21	348.5	5	20	7	13
08-021	2	68	1	2	2	1	1	2	2	120		1.224	112	2.65	1.27	570.7	2	20	7	13
08-022	2	59	2	3	3	1	2	2	2	35	21.121	1.575	80	2.55	1.3	77	3	40	13	27
08-023	2	59	1	2	2	1	2	2	2	94		1.085	126	2.1	1.41	314	7	20	7	13
08-025	2	52	2	3	3	1	2	2	2	42	22.1247	1.292	101	2.33	2.3	482	0	20	7	13
08-026	1	61	2	3	3	2	2	2	2	47	18.5809	1.493	106	2.7	1.65	304.6	0	20	7	13
08-027	2	59	3	3	3	1	2	2	2	77		1.584	102	1.92	0.76	887	7	20	7	13
08-028	2	65	1	3	3	1	2	2	2	118		1.164	112	1.87	1.73	803.3	1	31	8	23
08-029	2	61	2	1	1	2	2	2	2	48		1.282	99	2.64	1.63	746.1	4	20	7	13
08-030	2	58	2	2	2	1	1	2	2	215		1.108	106	2.15	2.2	93.5	5	41	9	32
08-031	1	59	3	3	3	1	2	2	2	40		1.524	103	2.22	2.03	154	0	20	7	13
08-032	2	58	2	3	3	2	2	2	2	114		1.312	139	2.3	1.79	346.6	22	46	11	35
08-033	2	59	2	3	3	1	2	2	2	81		1.62	106	2.24	1.25	406.3	14	20	7	13
08-034	1	68	2	3	3	1	1	2	1	110	19.3906	1.675	118	2.09	1.48	277.7	0	20	7	13
09-001	1	59	2	3	3	1	2	1	2	110	19.7266	1.514	106	2.68	1.9	517.6	5	20	7	13
09-002	1	56	2	2	2	1	2	2	2	67	21.875	1.531	119	2.09	1.32	546	0	20	7	13
09-003	2	58	2	3	3	1	2	2	2	88	21.79	1.279	112	2.14	1.92	249.1	9	20	7	13
09-004	1	59	2	3	2	1	2	2	2	59	20.8594	1.624	144	2.32	1.59	95.4	0	20	7	13
09-005	2	65	2	3	3	1	2	2	2	53		1.05	114	2.63	1.67	171.2	7	43	15	28
09-006	2	53	2	3	3	1	2	2	2	13	23.837	1.77	85	2.83	1.69	59.4	0	20	7	13
09-007	2	78	2	3	3	1	1	1	1	72	24.8889	1.662	94	2.07	1.81	286.5	0	20	7	13
09-008	2	59	3	3	3	1	1	2	2	14	22.8001	1.051	109	1.95	1.35	254.4	0	20	7	13
09-009	2	70	2	3	3	1	1	1	2	84	25.4366	1.344	98	2.22	1.97	53.5	12	20	7	13
09-010	1	57	2	3	3	1	2	2	2	125	28.3987	1.474	102	2.06	1.19	32.6	0	22	7	15
09-011	2	59	1	3	3	2	2	2	2	24	33.8741	1.131	107	2.02	1.8	98.3	11	20	7	13
09-012	1	69	2	3	3	1	2	2	2	98	26.2778	1.543	101	2.28	1.6	362	6	21	8	13
09-013	1	79	1	3	3	1	2	1	1	282	17.998	1.862	101	2.53	1.34	200.8	2	20	7	13
09-014	1	58	1	1	3	1	2	1	1	77	25.2493	1.029	66	2.35	1.26	534.8	2	25	7	18
09-015	2	59	3	3	3	1	2	2	2	77	15.0676	1.81	116	2.49	1.69	161.8	2	27	8	19
09-016	1	65	2	3	2	1	2	2	2	134	24.9135	1.36	93	2.32	2.68	661.6	9	22	7	15
09-017	2	68	2	3	3	1	2	2	1	94	23.2834	1.64	101	1.95	1.46	20.5	7	62	17	45
09-018	2	71	2	3	3	1	2	2	1	4	24.7221	1.038	110	2.59	1.94	168.1	17	23	7	16
09-019	1	59	2	2	2	1	1	2	1	19	21.6263	1.295	82	2.12	1.93	220	0	54	14	40
09-020	1	68	2	2	2	1	2	2	2	20	21.7265	1.099	108	2.04	1.68	195.1	8	61	16	45
09-021	1	70	3	2	3	2	2	2	2	8	24.3592	1.293	107	2.36	1.78	241.2	5	32	7	25
09-022	1	63	1	1	1	1	1	2	2	25	27.2463	1.044	108	2.15	1.43	173.4	3	20	7	13
09-023	2	58	2	3	3	1	2	2	2	144	23.2335	1.441	114	3.9	1.91	689.8	7	23	8	15
09-024	2	58	2	1	2	1	1	2	2	30	24.4261	1.042	104	1.98	1.55	239.4	11	46	8	38
09-025	1	77	2	3	3	1	1	2	2	30	24.8192	1.286	90	1.95	1.97	956.5	10	29	7	22
09-026	1	58	2	2	2	1	1	1	1	7	24.684	1	81	2.3	2.91	559.4	0	20	7	13
09-027	1	58	1	3	3	1	2	2	2	29	22.6183	1.271	92	2.29	1.01	146.8	5	21	7	14
09-028	1	78	1	2	2	1	1	2	2	92	26.0933	1.235	107	1.91	1.35	32.7	2	20	7	13
09-029	2	59	2	3	3	1	2	2	2	36	21.4844	1.417	111	2.1	2.05	261	6	20	7	13
09-030	1	79	2	3	3	1	1	1	2	125	27.9273	1.24	115	1.98	5.9	60.3	0	23	8	15
09-031	2	55	2	3	2	1	2	2	2	31	21.551	1.334	123	1.87	3.46	59	2	20	7	13
09-032	1	57	2	3	3	1	2	2	2	140	20.0893	1.561	112	2	2.28	143.2	0	21	7	14
09-033	2	54	2	2	2	1	1	2	1	30	22.2151	1.238	100	2.24	1.1	178.5	2	20	7	13
09-034	1	59	2	3	3	1	2	2	1	6		1.608	98	2.08	1.89	100	9	33	8	25
09-035	2	66	2	3	3	1	2	2	2	47		1.39	118	2.51	0.69	44.3	0	21	8	13
09-036	2	71	2	3	3	1	2	2	2	12		1.24	93	2.2	2.47	201.9	0	24	7	17
09-037	2	54	2	3	3	1	2	2	1	66		1.429	122	2.34	1.77	136.9	0	21	7	14
09-038	1	78	2	3	3	1	2	2	2	41		1.561	100	2.12	2.48	140.6	6	32	7	25
09-039	2	58	2	1	3	1	1	2	1	41		1.093	123	1.94	1.44	203.2	2	38	12	26
09-040	1	58	2	3	3	1	2	1	2	101	21.0799	1.707	116	2.27	1.82	455.6	16	48	10	38
09-041	1	78	2	1	2	1	2	2	2	71	20.7612	1.369	109	2.06	0.91	15.4	3	20	7	13
09-042	2	73	2	1	2	1	1	1	1	12	22.4001	1.009	130	1.75	1.64	156	1	20	7	13
09-043	1	58	1	2	2	1	1	1	1	65	27.102	1.141	136	1.67	2.49	756.5	7	41	7	34
09-044	1	77	1	3	3	2	2	2	2	7	26.5731	1.01	142	2.28	1.39	155.5	0	22	8	14
09-045	2	77	1	2	2	1	1	1	2	101	22.3183	1.339	109	1.89	2.12	304.2	0	20	7	13
09-046	1	55	2	3	2	1	2	2	1	7	21.083	1.398	91	1.99	1.8	322	0	20	7	13
09-047	1	78	2	2	2	1	1	2	1	61	28.5547	1.207	74	1.97	1.38	329	0	64	20	44
09-048	2	56	2	2	2	1	2	2	2	106	18.7755	1.271	113	1.92	2.14	186.5	6	26	7	19
09-049	2	57	3	3	3	1	1	2	2	50	27.6361	1.67	86	2.04	1.38	107.5	4	20	7	13
09-050	2	57	1	3	3	1	2	2	2	51	22.6912	1.549	110	2.43	2.35	389	0	20	7	13
09-051	2	61	2	3	2	1	2	2	2	126	27.1191	1.53	110	2.34	1.69	601.5	4	20	7	13
09-052	1	60	1	2	2	1	2	2	2	14	25.1024	1.143	114	2.17	1.3	199	7	20	7	13
09-053	1	68	2	2	2	1	2	1	2	30	19.9184	1.231	104	2.46	1.55	332	0	20	7	13
09-054	2	57	2	3	3	1	1	2	2	95	26.9531	1.318	105	2.19	1.93	332.7	4	20	7	13
09-055	1	52	3	2	2	2	2	2	2	89	24	1.324	103	2.17	0.75	672	0	64	20	44
09-056	2	57	1	3	3	1	1	1	1	90	16.606	1.671	126	2.51	1.55	99.7	0	20	7	13
09-057	2	69	2	2	2	1	1	2	2	19	21.6263	1.325	101	2.3	1.43	19.3	9	20	7	13
09-058	1	57	2	2	2	1	2	1	2	125	24.3836	1.371	109	2.47	1.79	458	6	20	7	13
09-059	2	65	2	2	2	1	1	2	2	3	24.2394	0.785	111	2.25	1.3	89	0	22	7	15
09-060	2	59	1	2	3	1	1	2	2	32	22.0932	1.282	121	2.39	2.64	314.8	9	20	7	13
09-061	2	57	2	3	3	1	1	2	2	90	29.8255	1.376	112	2.46	2.2	144.3	7	20	7	13
09-062	2	68	2	3	2	1	1	2	1	95	21.0468	1.52	109	2.48	1.27	77	0	22	7	15
09-063	2	67	2	2	2	1	2	1	2	18	25.3076	1.219	114	2.48	1.81	174.9	1	20	7	13
09-064	1	57	2	3	3	1	2	2	1	44	27.2793	1.325	97	2.41	1.56	160	10	41	11	30
09-065	1	71	2	3	3	1	1	1	1	5	20.5235	1.41	102	2.05	1.01	71.4	17	28	8	20
09-066	1	56	2	1	2	1	1	2	1	28	23.1882	1.37	121	2.33	1.48	124.7	18	23	7	16
09-067	2	59	2	3	3	1	1	2	1	48	18.1333	1.719	98	2.4	1.28	297.4	4	20	7	13
09-068	2	57	2	2	2	1	1	2	2	66	21.4357	1.163	116	2.19	1.8	858	3	20	7	13
09-069	2	69	2	3	3	1	2	2	2	132	27.268	1.235	94	2.51	1.5	448.1	10	23	7	16
09-070	2	58	2	3	1	1	2	2	2	31	24.6094	1.326	117	2.52	1.69	189	5	20	7	13
09-071	2	60	1	1	2	1	2	2	2	72	17.1972	1.811	102	2.18	2.22	132	23	51	10	41
09-072	2	58	2	2	2	1	2	2	2	99	21.5571	1.53	50	2.45	1.45	837.9	5	31	7	24
09-074	2	66	3	2	2	1	1	2	1	82	21.3675	1.578	114	2.35	1.6	149.8	3	20	7	13
09-075	2	56	2	3	3	1	1	1	1	57	25.2237	1.404	119	2.35	2.55	296.9	5	20	7	13
09-076	2	69	2	2	2	1	2	2	2	22	18.424	1.378	111	2.44	0.98	142.2	18	67	19	48
09-077	1	51	2	2	2	1	1	2	2	48	20.6869	1.358	109	2.24	1.49	642.6	2	20	7	13
09-078	2	67	2	2	2	1	2	2	2	103	20.5466	1.28	105	1.97	1.76	164.9	3	20	7	13
09-079	2	69	2	3	3	1	1	2	2	69	25.6312	1.622	86	2.23	1.96	59.1	5	20	7	13
09-080	2	56	2	3	3	1	2	2	2	90	20.7163	1.597	112	2.17	1.6	672.4	0	80	28	52
09-081	2	66	1	2	3	1	2	2	2	95	23.3377	1.354	109	2.08	0.7	150	3	20	7	13
09-082	2	54	3	3	3	1	2	2	1	63	21.7504	1.689	104	2.02	1.74	111.3	0	20	7	13
09-084	1	77	1	1	3	2	2	2	1	194	27.8718	1.39	101	2.14	1.3	12.5	3	20	7	13
09-085	2	68	2	3	3	1	1	1	2	126	28.4799	1.398	100	2.25	0.92	120.3	7	20	7	13
09-086	1	59	2	2	2	1	1	2	2	48	23.8751	1.129	103	2.06	1.17	157.1	7	20	7	13
09-087	2	56	2	2	2	2	2	1	2	77	26.9638	1.347	109	2.32	1.81	322	2	20	7	13
09-088	2	61	2	1	3	1	1	2	2	110	17.5028	1.853	113	2.62	1.99	346.6	19	20	7	13
09-089	1	68	3	3	3	1	2	2	1	42	33.2479	1.314	116	2.24	1.85	1080	2	20	7	13
09-090	2	73	2	2	2	1	1	1	1	67	21.4357	1.47	98	2.08	2.49	99.7	6	20	7	13
10-001	2	63	2	1	2	2	2	2	1	240	21.1203	1.648	137	2.17	1.4	68.51	3	20	7	13
10-002	1	80	2	1	2	1	2	1	2	65	23.5294	1.24	134	2.35	2.3	240.2	4	23	7	16
10-003	2	62	2	1	3	2	2	2	2	12	23.4375	1.629	117	2.32	1.57	130.7	1	20	7	13
10-004	2	68	1	2	3	2	2	2	2	9	21.7993	1.176	107	2.55	1.28	124.1	1	20	7	13
10-005	2	59	2	1	2	2	2	2	2	113	24.3026	1.248	122	2.67		49.17	0	20	7	13
10-006	2	63	2	1	2	1	2	1	1	120	23.5294	1.163	120	2.15	1.17	393.7	6	20	7	13
10-007	2	70	2	3	2	1	2	2	2	12	30.4653	0.961	113	2.22	1.52	161	3	20	7	13
10-008	2	77	2	3	3	1	1	1	2	10	21.1556	1.154	110	2.15	1.36	145.7	3	20	7	13
10-009	1	60	1	3	3	1	1	2	1	78	23.7954	1.704	102	1.97	1.63	182.7	1	20	7	13
10-010	2	54	2	2	3	1	1	2	2	54	23.8754	1.359	146	2.22	1.97	151.2	13	20	7	13
10-011	1	66	2	3	3	2	2	2	2	180	26.7299	1.196	96	2.11	2.46	231.4	2	20	7	13
10-012	1	68	1	1	2	1	2	2	2	209	23.7228	1.407	118	2.5	2.77	543.7	5	20	7	13
10-013	2	57	1	3	3	1	2	2	2	102	24.6914	0.948	97	2.4	2.99	399.1	4	22	7	15
10-014	2	54	2	3	3	2	2	1	2	1	21.3333		67	2.28	1.84	227.7	2	21	7	14
10-015	2	66	2	2	2	1	1	1	2	48	19.487	1.497	122	2.08	2.5	97.82	0	20	7	13
10-016	2	68	2	1	2	1	1	1	2	7	22.8374	1.343	93	2.05	2.53	113.1	1	20	7	13
10-017	2	64	2	2	2	1	2	2	1	4	23.03	0.907	78	1.94	1.76	117.5	4	20	7	13
10-018	1	79	1	1	2	1	2	1	1	185	20.4382		94	2.2	1.92	550.6	6	20	7	13
10-019	1	73	2	2	3	1	1	2	2	7	26.5118	1.092	114	2.23	0.63	57.19	4	21	7	14
10-020	1	75	2	1	1	1	2	1	1	77	29.4108	0.966	110	2.11	1.38	213.5	2	26	7	19
10-022	1	60	1	3	3	1	2	2	1	138	22.8928	2.024	112	2.22	1.74	5.5	4	20	7	13
10-023	1	66	2	3	3	1	1	1	2	53	19.0311	1.559	111	2.11	1.62	167.5	5	20	7	13
10-024	2	55	2	1	2	1	2	2	2	48	24.2215	5.57	135	2.41	1.39	167.9	5	20	7	13
10-025	1	54	2	1	2	1	2	2	1	48	20.4502	1.42	129	2.27	2.37	153	3	23	8	15
10-026	2	78	1	2	2	1	2	1	1	47	27.1626	1.234	128	2.17	1.76	725.1	3	20	7	13
10-027	2	68	2	3	2	1	2	1	1	77	17.1046	2.075	115	2.3	1.81	172	3	20	7	13
10-028	2	69	2	3	3	2	2	2	2	120	18.6709	1.965	103	2.08	1.29	245.8	1	20	7	13
10-029	2	75	3	3	3	1	2	1	2	60	21.9532	5.717	134	2.32	1.58	72.48	9	20	7	13
10-030	1	58	2	2	2	1	2	2	2	4	21.9671	0.91	104	2.26	1.52	311.2	0	20	7	13
10-031	1	56	1	3	3	1	1	2	1	41	25.3086	1.151	126	2.17	2.52	139.14	4	20	7	13
10-032	1	59	2	3	3	2	2	2	2	53	17.998	1.376	122	2.64	1.48	108	11	20	7	13
10-033	1	58	2	2	2	1	2	2	2	48	25.3086	1.249	111	2.02	1.05	286	3	20	7	13
10-034	1	68	2	2	2	1	2	2	1	8	20.4284		93	2.34	3.66	1461	4	20	7	13
10-035	1	58	3	3	3	1	2	2	1	41	23.3536	1.456	115	2.24	3.15	315.1	0	20	7	13
10-036	2	79	2	2	3	1	1	2	1	35	21.3039	1.496	117	2.06	2.92	218.5	0	20	7	13
10-037	1	62	2	1	3	1	2	2	1	132	23.1834	1.367	79	2.33	1.99	340.1	7	39	12	27
10-038	1	78	3	3	3	1	2	2	1	48	26.4381	1.433	118	2.45	2.4	33.44	3	20	7	13
10-039	2	71	2	3	3	1	1	2	2	10	20.9366	1.821	115	2.39	2.58	37.01	6	54	14	40
10-040	1	73	2	3	3	1	2	2	2	96	30.3906	1.322	99	1.4	3.65	5.5	19	20	7	13
10-041	1	64	2	3	3	1	1	2	1	48	28.4053	1.056	105	2.08	2.31	107.7	3	20	7	13
10-042	1	61	1	2	2	1	1	2	2	30	24.7598	1.248	120	2.35	3.95	162.8	7	33	7	26
10-043	1	80	3	2	3	1	1	2	2	89	19.1571	4.266	109	1.97	1.62	134.1	12	27	7	20
10-044	2	56	2	2	3	1	1	1	2	46	26.9061	1.175	126	2.07	2.73	91.79	5	20	7	13
10-045	2	59	2	3	3	1	2	2	2	37	19.2716	2.02	111	1.69	1.64	19.71	3	22	7	15
10-046	2	60	2	3	3	1	2	2	2	42	18.7305	1.472	110	2.06	1.23	269	5	20	7	13
10-047	2	70	2	2	2	1	2	2	2	8	29.551	1.277	93	1.84	2.3	595.4	2	20	7	13
10-048	2	66	2	2	2	1	2	2	2	36	29.3333	1.233	115	2.26	2.55	492.7	7	20	7	13
10-049	2	66	2	2	2	1	1	1	1	120	21.2803	1.171	120	2.33	2.33	207.2	1	20	7	13
10-050	2	56	2	3	2	1	1	2	2	13	21.1263	0.884	129	1.87	1.75	96.85	2	20	7	13
10-051	2	58	2	1	2	1	2	2	2	66	27.4235	1.304	109	1.94	1.65	232.1	2	20	7	13
10-052	1	70	2	1	2	2	2	2	2	6	20.7612			2.47	1.17	30.08	14	20	7	13
10-053	1	50	1	3	3	1	2	2	2	102	22.7204	1.472	102	1.97	1.84	268.2	6	34	11	23
10-054	1	50	2	2	3	1	1	2	1	30	32.6531	1.005	137	2.23	2.72	370.4	5	20	7	13
10-055	1	54	3	3	3	1	2	2	2	20	26.3646	1.132	113			119.7	1	20	7	13
10-056	2	61	2	2	2	1	2	2	2	24	24.7934	1.232	135	1.79	2.8	191.7	6	20	7	13
10-058	1	59	2	3	3	1	1	2	1	35	31.1328	0.985	102	2.32	0.84	146.2	3	20	7	13
10-059	1	59	2	3	3	1	1	2	1	41	26.4919	1.331	120	2.17	2.4	119.6	2	41	8	33
10-060	1	69	3	3	3	1	1	2	1	101	20.8048	1.373	111	2.19	1.66	418.7	3	20	7	13
10-061	1	58	2	1	2	1	1	1	2	3	25.4325	0.779	109	2.1	3.12	208.6	6	20	7	13
10-062	2	69	2	2	3	1	2	1	1	41	22.5391	1.545	100	2.14	1.43	115.9	7	20	7	13
10-063	2	57	1	3	3	1	2	2	2	2	17.5148	1.444	92	2.28	0.93	108.9	4	21	7	14
10-064	1	54	1	3	3	1	2	2	2	1	21.5978		65	2.44	1.73	420.4	2	20	7	13
10-065	2	55	2	3	3	1	1	2	1	60	18.8281	1.513	130	2.48	1.86	85.58	6	20	7	13
10-066	2	53	1	2	2	1	1	1	1	6	24.6531	1.453	116	2.43	2.89	71.16	3	22	7	15
10-067	2	67	2	2	2	1	2	2	2	7	23.9995		88	2.35	3.1	1461	2	20	7	13
10-068	1	58	2	1	2	1	1	2	2	13	27.4074	0.98	117	2.07	2.22	358	7	21	7	14
10-069	2	69	2	2	2	1	1	2	1	3	21.2837		108	1.88	2.42	146.6	14	21	7	14
10-070	2	51	2	2	3	1	1	1	1	6	39.5478	1.098	119			100	0	20	7	13
10-071	1	63	1	3	2	1	2	2	2	100	21.1939	1.315	119	2.11	1.24	433.4	5	20	7	13
10-072	2	69	2	1	3	1	1	2	2	35	28.3447	1.278	129	1.91	2.76	48.67	6	35	8	27
10-073	2	68	2	1	2	1	2	2	2	12	21.6263	1.139	113	2.2	1.47	222.8	2	20	7	13
10-074	2	53	2	3	2	1	2	2	2	6	22.6718	1.526	123	1.98	1.64	149.2	6	20	7	13
10-075	2	59	1	2	2	1	2	2	2	11	20.7899	1.207	106	2.26	2.24	114.5	1	20	7	13
10-076	2	68	1	1	2	1	1	2	2	7	22.2222		90	2.14	1.45	166.3	11	20	7	13
10-077	2	61	2	1	2	1	1	2	2	8	26.6749		116	2.19	2.57	120.9	4	20	7	13
10-078	2	70	2	1	2	2	2	1	2	19	29.0612	1.03	123	2.09	1.6	262.2	2	20	7	13
10-079	1	53	2	3	3	1	1	2	2	30	27.5391	1.64	118	1.93	2.57	152.5	7	22	7	15
10-080	2	79	2	2	2	1	1	1	2	65	22.5666	1.331	124	2.29	2.18	97.85	1	21	7	14
10-081	1	59	2	2	2	1	1	1	2	10	27.621	4.04	102	2.24	1.1	157.4	1	20	7	13
10-082	2	54	2	1	2	1	2	1	1	7	21.6263	1.508	112	1.75	1.86	156	1	23	10	13
10-083	2	71	1	2	2	1	1	2	2	3	23.1544	1.33	105	2	2	47.24	2	22	7	15
10-084	1	59	2	1	2	1	1	2	1	36	28.8789	1.233	90	2.29	1.88	117.1	11	26	7	19
10-085	1	72	1	2	2	1	2	1	1	186	21.7994	1.715	104	2.25	2.25	78.02	1	20	7	13
10-086	2	66	2	1	2	1	1	2	1	53	26.1246	1.509	110	1.93	2.37	199.3	1	20	7	13
10-087	2	69	2	1	2	1	2	2	2	7	20.4152	5.79	118	2.38	1.52	143.9	6	28	7	21
10-088	2	62	1	3	3	2	2	2	2	6	25.9698	1.393	97	2.04	2.95	184	8	20	7	13
10-089	2	69	1	1	3	1	1	2	1	26	23.1837	1.454	121	1.68	3.12	232.2	12	20	7	13
10-090	2	67	1	1	3	1	2	1	2	41	24.2424	1.358	127	2.2	1.73	119.3	7	20	7	13
10-091	1	58	2	2	3	2	2	2	2	120	20.8333	1.364	135	1.5	2.1	511.9	6	20	7	13
10-092	2	59	2	2	2	1	2	2	2	60	18.8268	1.529	97	2.14	2.37	176.2	3	20	7	13
11-001	2	56	2	2	2	1	1	2	2	34		1.65	115	2.21	1.62	96.72	3	20	7	13
11-002	1	59	2	3	3	1	1	1	1	65	29.2388	1.65	98	1.73	2.1	107.6	4	20	7	13
11-003	1	50	1	1	2	2	2	2	2	114		1.17	111	2.11	2.12	162.8	6	20	7	13
11-004	2	58	2	3	3	2	2	2	2	149		1.72	113	2.26	2.22	591.2	7	20	7	13
11-005	2	57	3	3	3	1	2	2	2	65		1.63	112	1.92	1.43	870.8	0	20	7	13
11-006	2	62	2	3	3	1	2	2	2	20		1.67	93	2.31	1.5	336.5	1	20	7	13
11-007	1	65	2	2	2	1	1	2	2	6		1.143	123	2.25	1.62	13.27	4	20	7	13
11-008	2	59	1	2	2	1	1	2	1	6		1.68	88	2.08	2.07	180.3	7	20	7	13
11-009	1	57	2	3	3	1	1	2	1	5	19.313	1.65	106	2.02	1.92	75.07	3	20	7	13
11-010	1	68	1	3	2	1	2	2	2	125	22.0386	1.67	109	2.32	2.36	1461	3	20	7	13
11-011	1	59	1	3	3	1	2	2	1	65	27.6817	1.336	117	1.91	2.36	374.5	1	20	7	13
11-012	1	71	1	3	3	1	2	2	2	106	21.4844	1.38	115	2.37	0.88	3.5	4	20	7	13
11-013	1	63	2	2	2	1	1	2	1	84		1.1	112	2.32	2.04	181.71	8	20	7	13
11-014	2	68	2	2	2	1	2	2	1	101		1.55	104	2.44	1.96	387.3	6	20	7	13
11-015	2	68	1	3	2	1	1	2	2	17		1.499	109	2.53	1.93	43.65		20	0	0
11-016	1	51	2	3	3	1	2	2	2	6	28.8705	1.28	99	2.34	1.42	202	11	20	7	13
11-017	1	59	1	3	2	1	2	2	2	41	22.0522	1.47	119	1.98	1.86	833.4	12	20	7	13
11-018	1	55	2	3	3	1	2	2	2	132	21.0303	1.6	101	2.26	2.14	42.6	8	21	7	14
11-020	2	72	2	2	1	1	2	2	2	56		1.14	106	1.93	1.82	181.71	5	20	7	13
11-021	1	59	2	2	2	1	1	2	1	17		0.99	119	2.22	2.5	126.2	5	20	7	13
11-022	2	57	2	3	2	2	2	2	2	216		1.55	125	1.93	1.7	180.5	3	20	7	13
11-023	1	50	2	2	3	1	2	2	2	24	20.2336	1.28	114	2.27	1.4	134.6	12	20	7	13
11-024	1	80	2	2	2	1	1	2	2	17		1.28	120	2.09	2.12	166.3	3	20	7	13
11-025	1	69	1	3	3	1	1	2	2	132		1.52	102	1.93	1.17	393.7	7	20	7	13
11-026	2	63	2	3	3	2	2	2	2	6	19.0311	1.82	117	1.91	2.68	502.3	8	20	7	13
11-027	2	80	2	1	3	1	2	1	2	29	29.0533	1.95	121	2.05	2.14	211.4	2	20	7	13
11-028	1	68	1	3	3	1	1	2	1	78		1.95	104	2.67	0.83	467.4	2	20	7	13
11-029	2	77	2	3	3	1	2	1	2	77		1.51	114	2.13	1.16	217.5	10	20	7	13
11-030	1	68	1	2	2	1	1	2	1	93		1.277	125	2.19	2.43	123.8	1	20	7	13
11-031	2	58	2	3	3	1	1	2	2	48		0.92	120	2.22	1.77	84.07	0	20	7	13
11-032	2	67	3	3	3	1	2	2	2	77		1.3	110	2.24	1.56	173.2	10	20	7	13
11-033	2	58	1	3	3	1	2	2	2	59		1.03	112			301.4	3	20	7	13
11-034	2	60	1	3	3	1	2	2	2	90		1.12	115	2.08	1.36	1171	25	49	11	38
11-035	1	56	1	3	3	2	2	2	2	73		1.51	113	1.97	2.49	11.6	14	29	7	22
